# Supplementary material for: The 3D submicron-scale skeletal reconstruction of Nannoconus (Cretaceous calcareous nannofossil) – Insights on biomineralization
Source: Copernicus journal article supplement (doi:10.5194/egusphere-2025-1840), 2025-06-23
Supplement: Supplementary file [file egusphere-2025-1840-AC2-supplement.pdf]

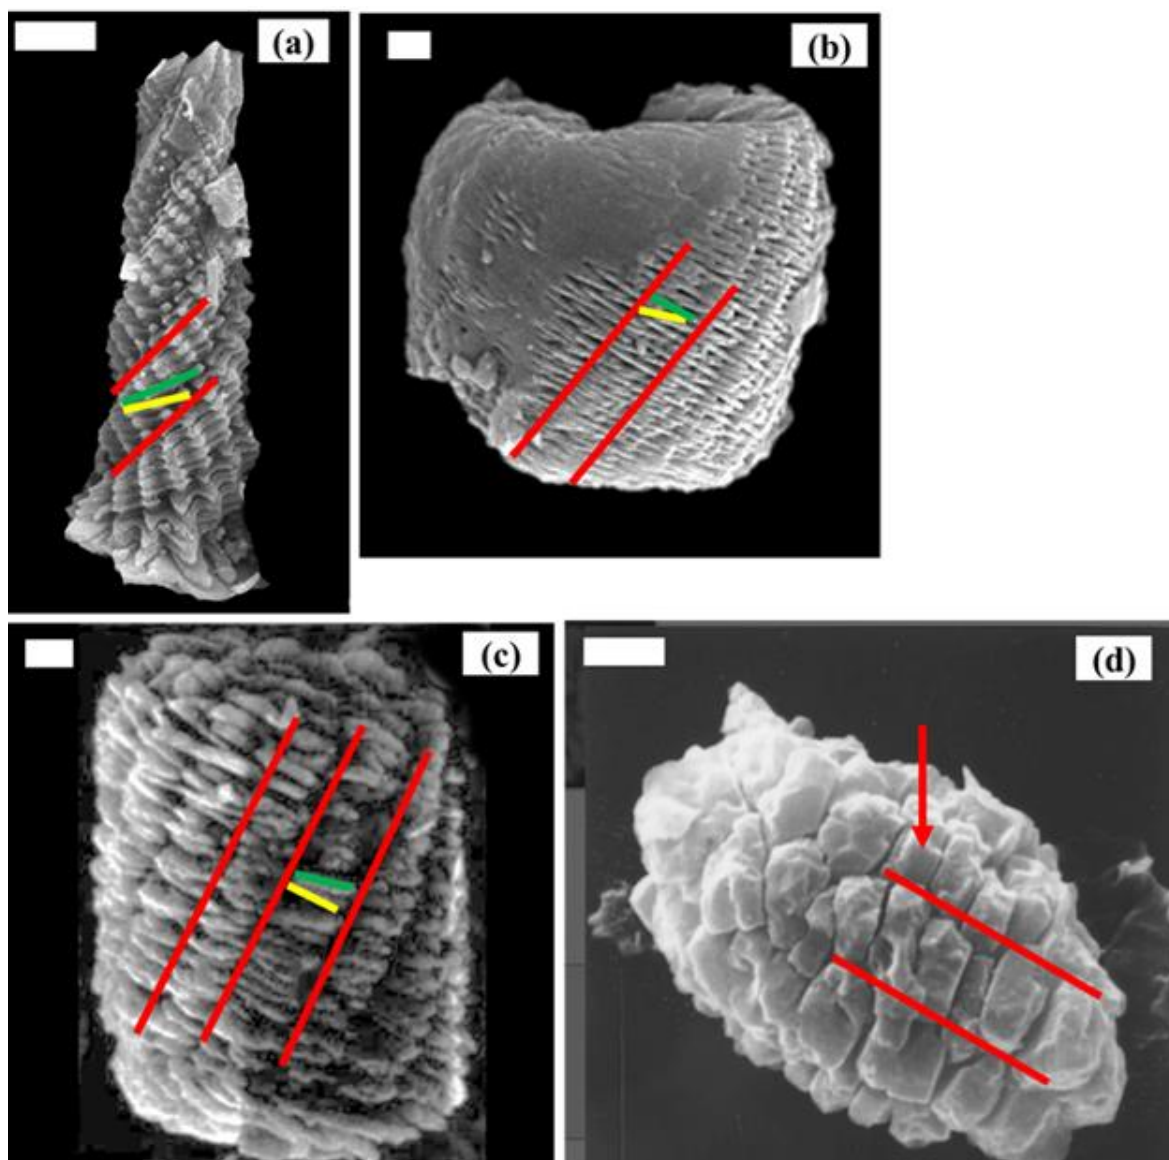

Scanning electron microscopic images of different species of *Nannoconus*, with the segments, marked in red lines along with lamella-A (yellow line) and -B (green line). **(a)** *N. funiculus*; modified from Lees and Bown (2016). **(b)** *N. globulus*, from DSDP Leg-93-Site 603 (Atlantic Ocean, lower continental rise of Cape Hatteras; core 44, interval 115-116 cm) presented in Fig. B2d in this study. **(c)** *N. truittii*; modified from Hattner and Wise (1980). **(d)** *N. compressus*; modified from Bown and Cooper (1998). The red arrows indicate lamellae which have fused and thickened due to overgrowth. The two types of lamellae (i.e., -A and -B) cannot be distinguished separately. This specimen however, has preserved the organization of the segments. The white bar represents 1 micrometer.

## References

- Bown, P. and Cooper, M.: Jurassic, Calcareous nannofossil biostratigraphy, 34–85, 1998.
- Hattner, J. G. and Wise, S. W.: Upper Cretaceous calcareous nannofossil biostratigraphy of South Carolina. South Carolina Geology, 24, 41-117, 1980.
- Lees, J. A. and Bown, P. R.: New and intriguing calcareous nannofossils from the Turonian (Upper Cretaceous) of Tanzania, Journal of Nannoplankton Research, 36, 83–95, 2016.
